1 **TITLE**

2

3 Healthcare workers hospitalized due to COVID-19 have no higher risk of death

4 than general population. Data from the Spanish SEMI-COVID-19 Registry.

5 **SHORT TITLE**

6 Risk of death of healthcare workers hospitalized due to COVID-19

7 **AUTHORS**

8

9 Jesús Díez-Manglano<sup>1\*</sup>, Marta Nataya Solís Marquínez<sup>2</sup>, Andrea Álvarez

10 García<sup>2</sup>, Nicolás Alcalá-Rivera<sup>1</sup>, Irene Maderuelo Riesco<sup>2</sup>, Martín Gericó

11 Aseguinolaza<sup>1</sup>, José Luis Beato Pérez<sup>3</sup>, Manuel Mendez Bailon<sup>4</sup>, Ane Elbire

12 Labirua-Iturburu Ruiz<sup>5</sup>, Miriam García Gómez<sup>6</sup>, Carmen Martinez Cilleros<sup>7</sup>,

13 Paula Maria Pesqueira Fontan<sup>8</sup>, Lucy Abella Vázquez<sup>9</sup>, Julio César Blázquez

14 Encinar<sup>10</sup>, Ramon Boixeda<sup>11</sup>, Ricardo Gil Sánchez<sup>12</sup>, Andrés de la Peña

15 Fernández<sup>13</sup>, Jose Loureiro Amigo<sup>14</sup>, Joaquin Escobar Sevilla<sup>15</sup>, Marcos

16 Guzmán Garcia<sup>16</sup>, María Dolores Martín Escalante<sup>17</sup>, Jeffrey Oskar Magallanes

17 Gamboa<sup>18</sup>, Angel Luís Martínez Gonzalez<sup>19</sup>, Carlos Lumbreras Bermejo<sup>20</sup>, Juan

18 Miguel Antón Santos<sup>21</sup>, for the SEMI-COVID-19 Network\*\*.

19

20 <sup>1</sup> Internal Medicine Department, Royo Villanova Hospital, Zaragoza, Spain

21 <sup>2</sup> Internal Medicine Department, San Agustin University Hospital, Avilés

22 (Asturias), Spain

23 <sup>3</sup> Internal Medicine Department, Albacete University Hospital, Albacete, Spain

24 <sup>4</sup> Internal Medicine Department, San Carlos Clinical Hospital, Madrid, Spain

25 <sup>5</sup> Internal Medicine Department, Santa Marina Hospital, Bilbao, Spain

26 <sup>6</sup> Internal Medicine Department, Urduliz Alfredo Espinosa Hospital, Urdúliz

27 (Vizcaya), Spain

28 <sup>7</sup> Internal Medicine Department, HLA Moncloa Hospital, Madrid, Spain

29 <sup>8</sup> Internal Medicine Department, Santiago Clinical Hospital, Santiago de  
30 Compostela (A Coruña), Spain

31 <sup>9</sup> Internal Medicine Department, Ntra Sra Candelaria University Hospital, Santa  
32 Cruz de Tenerife, Spain

33 <sup>10</sup> Internal Medicine Department, Torrevieja University Hospital, Torrevieja  
34 (Alicante), Spain

35 <sup>11</sup> Internal Medicine Department, Mataró Hospital, Mataró (Barcelona), Spain

36 <sup>12</sup> Internal Medicine Department, La Fe University Hospital, Valencia, Spain

37 <sup>13</sup> Internal Medicine Department, Son Llàtzer University Hospital, Palma de  
38 Mallorca, Spain

39 <sup>14</sup> Internal Medicine Department, Moisès Broggi Hospital, Sant Joan Despí  
40 (Barcelona), Spain

41 <sup>15</sup> Internal Medicine Department, Virgen de las Nieves University Hospital,  
42 Granada, Spain

43 <sup>16</sup> Internal Medicine Department, San Juan de la Cruz Hospital, Úbeda (Jaén),  
44 Spain

45 <sup>17</sup> Internal Medicine Department, Costa del Sol Hospital, Marbella (Málaga),  
46 Spain

47 <sup>18</sup> Internal Medicine Department, Nuestra Señora del Prado Hospital, Talavera  
48 de la Reina (Toledo), Spain

49 <sup>19</sup> Internal Medicine Department, León University Hospital, León, Spain

50 <sup>20</sup> Internal Medicine Department, 12 de Octubre University Hospital, Madrid,  
51 Spain

52 <sup>21</sup> Internal Medicine Department, Infanta Cristina University Hospital, Parla  
53 (Madrid), Spain

54

55 **\*Corresponding authors:**

56 - Dr Jesús Díez-Manglano. Internal Medicine Department, Royo Villanova

57 Hospital. Avenida San Gregorio, nº 30, 50015 Zaragoza, Spain

58 (jdiez@aragon.es)

59

60 **Author Contributions:** Conceptualization, Jesús Díez-Manglano and Nataya

61 Solís Marquínez; Data curation, Jesús Díez-Manglano, Nataya Solís

62 Marquínez, Andrea Álvarez García, Nicolás Alcalá-Rivera, Irene Maderuelo

63 Riesco, Martín Gericó Aseguinolaza, José Luis Beato Pérez, Manuel Mendez

64 Bailon, Ana Elbire Labirua-Iturburu Ruiz, Miriam García Gómez, Carmen

65 Martínez Cilleros, Paula María Pesqueira Fontán, Julio César Blázquez

66 Encimar, Ramon Boixeda, Ricardo Gil Sánchez, Andrés de la Peña-Fernández,

67 José Loureiro Amigo, Joaquin Escobar Sevilla, Marcos Guzmán García, María

68 Dolores Martín Escalante, Jeffrey Oskar Magallanes García, Ángel Luis

69 Martínez-González, Carlos Lumbreras Bermejo and Juan Miguel Antón Santos;

70 Formal analysis, Jesús Díez-Manglano, Nataya Solís Marquínez and Lucy

71 Abella Vázquez; Investigation, Jesús Díez-Manglano and Nataya Solís

72 Marquínez; Methodology, Jesús Díez-Manglano and Nataya Solís Marquínez;

73 Project administration, Carlos Lumbreras Bermejo and Juan Miguel Antón

74 Santos; Supervision, Carlos Lumbreras Bermejo and Juan Miguel Antón

75 Santos; Validation, Jesús Díez-Manglano and Nataya Solís Marquínez; Writing

76 – original draft, Jesús Díez-Manglano and Nataya Solís Marquínez; Writing –

77 review & editing, Nicolás Alcalá-Rivera, Irene Maderuelo Riesco, Martín Gericó

78 Aseguinolaza, José Luis Beato Pérez, Manuel Mendez Bailon, Ana Elbire

79 Labirua-Iturburu Ruiz, Miriam García Gómez, Carmen Martínez Cilleros, Paula  
80 María Pesqueira Fontán, Lucy Abella Vázquez, Julio César Blázquez Encimar,  
81 Ramon Boixeda, Ricardo Gil Sánchez, Andrés de la Peña-Fernández, José  
82 Loureiro Amigo, Joaquin Escobar Sevilla, Marcos Guzmán García, María  
83 Dolores Martín Escalante, Jeffrey Oskar Magallanes García, Ángel Luis  
84 Martínez-González, Carlos Lumbreras Bermejo and Juan Miguel Antón Santos.;  
85 funding acquisition, none. All authors have read and agreed to the published  
86 version of the manuscript.

87

88 **\*\*A complete list of the SEMI-COVID-19 Network members is provided in**  
89 **the Acknowledgments.**

90

91 **Funding:**

92 None.

93

94 **Disclosure**

95 The authors declare no conflict of interest.

96

97

98 **ABSTRACT**

99 **Aim:** To determine whether healthcare workers (HCW) hospitalized in Spain  
100 due to COVID-19 have a worse prognosis than non-healthcare workers  
101 (NHCW).

102 **Methods:** Observational cohort study based on the SEMI-COVID-19 Registry, a  
103 nationwide registry that collects sociodemographic, clinical, laboratory, and  
104 treatment data on patients hospitalised with COVID-19 in Spain. Patients aged  
105 20-65 years were selected. A multivariate logistic regression model was  
106 performed to identify factors associated with mortality.

107 **Results:** As of 22 May 2020, 4393 patients were included, of whom 419 (9.5%)  
108 were HCW. Median (interquartile range) age of HCW was 52 (15) years and  
109 62.4% were women. Prevalence of comorbidities and severe radiological  
110 findings upon admission were less frequent in HCW. There were no difference  
111 in need of respiratory support and admission to intensive care unit, but  
112 occurrence of sepsis and in-hospital mortality was lower in HCW (1.7% vs.  
113 3.9%;  $p=0.024$  and 0.7% vs. 4.8%;  $p<0.001$  respectively). Age, male sex and  
114 comorbidity, were independently associated with higher in-hospital mortality and  
115 healthcare working with lower mortality (OR 0.219, 95%CI 0.069-0.693,  
116  $p=0.01$ ). 30-days survival was higher in HCW (0.968 vs. 0.851  $p<0.001$ ).

117 **Conclusions:** Hospitalized COVID-19 HCW had fewer comorbidities and a  
118 better prognosis than NHCW. Our results suggest that professional exposure to  
119 COVID-19 in HCW does not carry more clinical severity nor mortality.

120

121 **Key words:** SARS-CoV-2; coronavirus; COVID-19; Spain; healthcare workers;  
122 mortality

123

## 124 **INTRODUCTION**

125 As of 30 October 2020, coronavirus disease 2019 (COVID-19), caused  
126 by severe acute respiratory syndrome coronavirus 2 (SARS-CoV-2), has  
127 affected 44,592,789 people worldwide (1). Spain has been one of the countries  
128 with the highest number of confirmed cases and deaths.

129

130 Healthcare workers (HCW) are at high risk of infection with SARS-CoV-2  
131 because of their exposure to infected patients. Several seroepidemiological  
132 studies have shown discordant results. In New York and Sweden the  
133 seroprevalence of SARS-CoV-2 among hospital HCW was high compared with  
134 the community (2,3). However, in Germany the seroprevalence in HCW was  
135 very low, 0.33% (4). A recent systematic review and meta-analysis, that  
136 included 11 studies, reported that the overall proportion of HCW who were  
137 SARS-CoV-2 positive among all COVID-19 patients was 10.1% (5). In Spain,  
138 20.4% of confirmed COVID-19 cases were HCW (6).

139

140 In Scotland, HCW and their households contributed a sixth of COVID-19  
141 admissions to hospital (7). In Spain and USA, 10% and 8% of HCW with  
142 COVID-19 were hospitalized respectively (6,8). Young women nurses were  
143 more frequently infected (9-11). Comorbidities were frequent in HCW  
144 hospitalized with COVID-19, particularly diabetes, hypertension, obesity,  
145 asthma and immunodepression (6, 10,11).

146

147           There is still controversy over the risk of death in HCW with COVID-19.  
148   While it is high in Mexico, it is low in Germany and Malaysia (12,13). The main  
149   objectives of this study were to describe the clinical characteristics and  
150   outcomes of HCW hospitalised in Spain due to SARS-CoV-2 infection, and to  
151   determine if working in healthcare is associated with higher rates of  
152   complications and mortality.

153

## 154   **METHODS**

### 155   **Study design and population**

156           The SEMI-COVID-19 Registry is an ongoing, nationwide, multicentre,  
157   observational retrospective registry, participated by 150 hospital centres  
158   throughout Spain. Detailed features of the registry have been reported  
159   elsewhere (14-16). A total of 10,600 consecutive patients were recruited from  
160   March 1, 2020 to May 22, 2020.

161

### 162   **Inclusion criteria**

163           The SEMI-COVID-19 Registry includes patients > 18 years admitted to  
164   hospital with COVID-19 confirmed microbiologically by reverse transcription  
165   polymerase chain reaction (RT-PCR) testing of a nasopharyngeal swab sample,  
166   sputum specimen or bronchoalveolar lavage. The exclusion criteria were  
167   subsequent admission of the same patient or denial or withdrawal of informed  
168   consent. This study analyses the subpopulation of patients between 20 and 65  
169   years of age. In Spain, 20 years is the youngest possible age for working in  
170   healthcare and 65 years is the retirement age. HCW were defined as

171 physicians, nurses, nurse aides, and non-healthcare professionals such as the  
172 administrative and cleaning staff of hospitals and healthcare centres.

173

#### 174 **Procedures and variables**

175 Admission and treatment of patients took place at the discretion of the  
176 attending physicians based on their clinical judgment, local protocols, and the  
177 updated recommendations of the Spanish Ministry of Health.

178

179 Data were collected retrospectively in an online electronic data capture  
180 system and were extracted from electronic health records. Approximately 300  
181 variables were collected including epidemiological data, RT-PCR data, personal  
182 medical and medication history, symptoms and physical examinations findings  
183 at admission, laboratory and diagnostic imaging tests, pharmacological  
184 treatment and ventilator support during hospitalization, complications and death  
185 during hospitalization, and readmissions and survival 30 days after diagnosis.  
186 Comorbidity was assessed using the Charlson Comorbidity Index (CCI) (17).  
187 Degree of independence was classified as independent or mild, moderate, and  
188 severe. Obesity was defined as body mass index  $>30 \text{ kg/m}^2$ .

189

190 The main endpoint was mortality during admission. Intensive care unit  
191 (ICU) admission, days in the ICU, invasive or non-invasive ventilation, all-cause  
192 re-admission, 30-days all-cause mortality, and length-of-stay were secondary  
193 endpoints.

194

#### 195 **Ethical aspects**



196           The study was carried out in accordance with the Declaration of Helsinki.  
197   The processing of personal data strictly complied with Spanish Law 14/2007, of  
198   July 3, on Biomedical Research and Spanish Organic Law 3/2018, of 5  
199   December, on the Protection of Personal Data and the Guarantee of Digital  
200   Rights. The study was approved by the Provincial Research Ethics Committee of  
201   Málaga (Spain) following the recommendation of the Spanish Agency of  
202   Medicines and Medical Products (AEMPS, for its initials in Spanish). All  
203   patients—or their caregivers, in the event they presented with cognitive  
204   impairment—gave their informed oral consent.

205

#### 206   **Statistical analysis**

207           The patients were divided into two groups: HCW and non HCW (NHCW).  
208   Continuous variables were tested for normal distribution with the Kolmogorov-  
209   Smirnov test. Quantitative variables are expressed as mean (standard  
210   deviation, SD) or median [interquartile range]. Comparisons between groups  
211   were made using Student's t-test and the Mann-Whitney U test. Categorical  
212   variables are expressed as absolute frequencies and percentages.  
213   Comparisons between them were made using the chi-square test with the Yates  
214   correction and with the Fisher's exact test when necessary.

215

216           Two multivariate logistic regression models were performed to analyse  
217   the association between working in healthcare and mortality,. The first model  
218   included age, sex, ethnicity, CCI score, and healthcare working. The second  
219   model included the previous variables and added the comorbidities with a  
220   statistical significance  $p < 0.1$  in the univariate model.

221

222 In all cases, statistical significance was established as  $p < 0.05$ . Statistical  
223 analysis was carried out using Statistical Package for the Social Sciences  
224 (SPSS) 21.0 software for Windows.

225

## 226 RESULTS

227 **Figure 1** shows the flowchart for patient inclusion. A total of 4,393  
228 patients were included, of which 419 (9.5%) were HCW. Among HCW, 142  
229 (33.9%) were medical doctors, 107 (25.5%) were nurses, 98 (23.4%) were  
230 nurse aides, and 72 (17.2%) held other positions within healthcare. The  
231 departments that most infected patients worked in were primary care (16.6%),  
232 the emergency department (11.3%), and internal medicine (11.3%).

233

234 Figure 1. Patient inclusion flowchart

235

### 236 Demographic and clinical characteristics

237 Baseline demographic and clinical characteristics and comorbidities are  
238 shown in **Table 1**. HCW were more often Caucasian women, and reported more  
239 frequent contact with a COVID-19 patient (57.8% vs. 22.1%,  $p < 0.001$ ).  
240 Moderate and severe dependence was more frequent in NHCW. There was no  
241 difference in comorbidity measured as Charlson index score, but the prevalence  
242 of comorbidities as alcohol use disorder, hypertension, dyslipidemia, obesity,  
243 diabetes, myocardial infarction, stroke, dementia, chronic obstructive pulmonary  
244 disease, obstructive sleep apnea-hypopnea syndrome, chronic kidney disease  
245 and malignancy was higher in NHCW.

246

247

**Table 1. Sociodemographic characteristics, comorbidities and treatment of patients included**

|                                             | <b>Total<br/>(n=4393)</b> | <b>NHCW<br/>(n=3974)</b> | <b>HCW<br/>(n=419)</b> | <b>p</b> |
|---------------------------------------------|---------------------------|--------------------------|------------------------|----------|
| Age, years (n=4393)                         | 53 (15)                   | 53 (15)                  | 52 (15)                | 0.439    |
| Gender, female (n=4386)                     | 1791 (40.8)               | 1530 (38.6)              | 261 (62.4)             | <0.001   |
| Race/ethnicity (n=4303)                     |                           |                          |                        |          |
| Caucasian                                   | 3399 (79.0)               | 3038 (78.1)              | 361 (87.2)             | <0.001   |
| BAME people                                 | 904 (21.0)                | 851 (21.91)              | 53 (12.8)              |          |
| <b>Dependency (n=4351)</b>                  |                           |                          |                        |          |
| Independent or mild                         | 4195 (96.4)               | 3779 (96.1)              | 416 (99.5)             | 0.001    |
| Moderate                                    | 77 (1.8)                  | 75 (1.9)                 | 2 (0.5)                |          |
| Severe                                      | 79 (1.8)                  | 79 (2.0)                 | 0 (0.0)                |          |
| <b>Tobacco use (n=4191)</b>                 |                           |                          |                        |          |
| Current smoker                              | 289 (6.9)                 | 266 (7.0)                | 23 (5.6)               | 0.291    |
| Alcohol use disorder (n=4278)               | 190 (4.4)                 | 187 (4.8)                | 3 (0.7)                | <0.001   |
| Charlson Comorbidity Index (n=4274)         | 0 (1)                     | 0 (1)                    | 0 (1)                  | 0.447    |
| <b>Comorbidities</b>                        |                           |                          |                        |          |
| Hypertension (n=4388)                       | 1116 (25.4)               | 1044 (26.3)              | 72 (17.2)              | <0.001   |
| Dyslipidaemia (n=4389)                      | 1019 (23.2)               | 946 (23.8)               | 73 (17.1)              | 0.003    |
| Obesity (n=4005)                            | 872 (21.8)                | 803 (22.2)               | 698 (17.6)             | 0.037    |
| Diabetes mellitus (n=4374)                  | 457 (10.4)                | 434 (11.0)               | 23 (5.5)               | 0.001    |
| AMI (n=4387)                                | 76 (1.7)                  | 75 (1.9)                 | 1 (0.2)                | 0.014    |
| Heart failure (n=4387)                      | 64 (1.5)                  | 61 (1.5)                 | 64 (1.5)               | 0.182    |
| Atrial fibrillation (n=4382)                | 86 (2.0)                  | 83 (2.1)                 | 3 (0.7)                | 0.054    |
| Stroke/TIA (n=4378)                         | 96 (2.2)                  | 94 (2.4)                 | 2 (0.5)                | 0.012    |
| Dementia (n=4381)                           | 47 (1.1)                  | 47 (1.2)                 | 0 (0)                  | 0.025    |
| COPD (n=4384)                               | 99 (2.3)                  | 99 (2.5)                 | 0 (0)                  | 0.001    |
| OSAHS (n=4362)                              | 232 (5.3)                 | 223 (5.7)                | 9 (2.2)                | 0.002    |
| Moderate-severe CKD (n=4382)                | 97 (2.2)                  | 94 (2.4)                 | 3 (0.7)                | 0.028    |
| Moderate-severe CLD (n=4387)                | 36 (0.8)                  | 36 (0.9)                 | 0 (0)                  | 0.050    |
| Malignancy (n=4363)                         | 254 (5.8)                 | 239 (6.1)                | 15 (3.6)               | 0.042    |
| <b>Biochemistry</b>                         |                           |                          |                        |          |
| Glucose, mg/dL (n=4231)                     | 105 (29)                  | 105 (10)                 | 102 (24)               | 0.027    |
| Creatinine mg/dL (n=4355)                   | 0.83 (0.31)               | 0.84 (0.15)              | 0.76 (0.35)            | <0.001   |
| Urea, mg/dL (n=3336)                        | 29 (15)                   | 29 (6)                   | 26 (11)                | <0.001   |
| LDH, U/L (n=3887)                           | 304 (171)                 | 299 (63)                 | 273 (127)              | <0.001   |
| AST, U/L (n=3470)                           | 36 (27)                   | 37 (11)                  | 30 (21)                | <0.001   |
| ALT, U/L (n=4191)                           | 35 (30)                   | 35 (12)                  | 30 (25)                | <0.001   |
| CRP, mg/L (n=4355)                          | 41.8 (89)                 | 49 (23)                  | 27.8 (64.7)            | <0.001   |
| Serum ferritin, mcg/L (n=1629)              | 643 (1028)                | 669 (364)                | 388 (779)              | 0.001    |
| D-dimer, ng/mL (n=3485)                     | 550 (544)                 | 490 (199)                | 410 (431)              | 0.001    |
| <b>Blood count</b>                          |                           |                          |                        |          |
| Haemoglobin, g/dL (n=4368)                  | 14.3 (2)                  | 14.4 (2)                 | 14.2 (1.6)             | 0.044    |
| WBC, x10 <sup>9</sup> /L (n=4370)           | 5900 (3400)               | 5910 (1310)              | 5530 (2840)            | 0.005    |
| Lymphocytes (n=4365)                        | 1000 (610)                | 1000 (245)               | 1072 (600)             | 0.261    |
| Platelets (n=4373)                          | 200500 (103250)           | 196000 (42000)           | 187000 (90000)         | 0.103    |
| <b>Radiological findings</b>                |                           |                          |                        |          |
| Bilateral condensation (n=4352)             | 1,378 (31.7)              | 1267 (32.2)              | 111 (26.7)             | 0.033    |
| Bilateral interstitial infiltrates (n=4355) | 2322 (53.3)               | 2128 (54.0)              | 194 (46.7)             | 0.018    |
| Pleural effusion (n=4356)                   | 104 (2.4)                 | 101 (2.5)                | 3 (0.7)                | 0.047    |
| <b>Treatments</b>                           |                           |                          |                        |          |
| LPV/r (n=4357)                              | 3096 (71.1)               | 2,803 (71.0)             | 291 (71.3)             | 0.913    |
| Interferon Beta-1B (n=4329)                 | 567 (13.1)                | 520 (13.3)               | 47 (11.5)              | 0.312    |
| Remdesivir (n=4315)                         | 27 (0.6)                  | 21 (0.5)                 | 6 (1.5)                | 0.023    |
| Hydroxychloroquine (n=4366)                 | 3916 (89.7)               | 3531 (89.3)              | 385 (93.0)             | 0.020    |
| Tocilizumab (n=4349)                        | 462 (10.6)                | 413 (10.5)               | 49 (12.0)              | 0.359    |
| Systemic corticosteroids (n=4346)           | 1228 (28.3)               | 1121 (28.5)              | 107 (26.0)             | 0.279    |

ALT: alanine aminotransferase; AMI: acute myocardial infarction; AST: aspartate aminotransferase; BAME: black, Asian and minority ethnic; CLD: chronic liver disease; CCI: Charlson Comorbidity Index; CKD: chronic kidney disease; COPD: chronic obstructive pulmonary disease; CRP: C-reactive protein; LDH: lactate dehydrogenase; OSAHS: obstructive sleep apnoea/hypopnoea syndrome; TIA: transient

ischemic attack, WBC: white blood cell.  
Data are expressed as median (interquartile range) and n (%).

248           The median time from first symptoms to admission was 7 [5-9] days,  
249 without difference between HCW and NHCW. There were some differences in  
250 symptoms and physical examination findings. Dry cough (72.3% vs. 67.3%,  
251  $p=0.003$ ), asthenia (54.6% vs. 44.8%,  $p<0.001$ ), arthralgia (48.1% vs. 39.2%,  
252  $p<0.001$ ), ageusia (14.6% vs. 9.4%,  $p=0.001$ ) and anosmia (14.6% vs. 8.7%,  
253  $p<0.001$ ) were more frequent in HCW, and temperature  $\geq 38^{\circ}\text{C}$  (74.4% vs.  
254 68.5%,  $p=0.007$ ) and oxygen saturation  $\leq 92\%$  (24.2% vs 11.8%,  $p<0.001$ ) in  
255 NHCW.

256

257           At admission the levels of serum glucose, creatinine, urea, lactate  
258 dehydrogenase, aspartate aminotransferase, alanine aminotransferase, C-  
259 reactive protein, ferritin, D-dimer, hemoglobin and the count of white blood cells  
260 were lower in HCW. NHCW presented more frequently severe radiological  
261 findings—i.e. pleural effusion, bilateral condensation, and bilateral interstitial  
262 infiltrates (all  $p\leq 0.025$ ).

263

## 264           **Treatments**

265           There were no differences in the treatment for COVID-19 disease  
266 between HCW and NHCW except for hydroxychloroquine and remdesivir (93%  
267 vs. 89.3%;  $p=0.02$  and 1.5% vs. 0.5%;  $p=0.023$  respectively).

268

## 269           **Outcomes**

270           Sepsis was more frequent in NHCW (3.9% vs. 1.7%;  $p=0.024$ ). There  
271 were no differences in the occurrence of other complications, the need of  
272 respiratory support or ICU admission. The length of hospital stay was 8 (7) days

273 without difference among HCW and NHCW. During hospitalization 194 (4.4%)  
 274 patients died. In-hospital mortality was lower in HCW (0.7% vs 4.8%;  $p < 0.001$ ).  
 275 The readmission rate was 2.9%. Half of readmissions were due to COVID-19  
 276 disease (**Table 2**). The 30-days survival was 96.8% in HCW and 85.1% in  
 277 NHCW ( $p = 0.001$ ). **Figure 2** shows the Kaplan-Meier survival curve.

278 **Table 2. Outcomes**

|                                                                                                                                     | Total       | NHCW       | HCW       | p         |
|-------------------------------------------------------------------------------------------------------------------------------------|-------------|------------|-----------|-----------|
| <b>Complications</b>                                                                                                                |             |            |           |           |
| Bacterial pneumonia ( $n=4356$ )                                                                                                    | 330 (7.6)   | 305 (7.7)  | 25 (6.0)  | 0.209     |
| ARDS ( $n=4355$ )                                                                                                                   | 1001 (23.0) | 919 (23.3) | 82 (19.8) | 0.101     |
| Acute kidney failure ( $n=4353$ )                                                                                                   | 243 (5.6)   | 228 (5.8)  | 15 (3.6)  | 0.068     |
| Sepsis ( $n=4351$ )                                                                                                                 | 160 (3.7)   | 153 (3.9)  | 7 (1.7)   | 0.024     |
| Shock ( $n=4349$ )                                                                                                                  | 132 (3.0)   | 125 (3.2)  | 7 (1.7)   | 0.094     |
| Thromboembolic disease<br>( $n=4350$ )                                                                                              | 71 (1.6)    | 64 (1.6)   | 7 (1.7)   | 0.921     |
| <b>Respiratory support</b>                                                                                                          |             |            |           |           |
| High flow nasal cannula ( $n=4334$ )                                                                                                | 327 (7.5)   | 293 (7.5)  | 34 (8.2)  | 0.578     |
| Noninvasive mechanical<br>ventilation ( $n=4357$ )                                                                                  | 174 (4.0)   | 156 (4.0)  | 18 (4.3)  | 0.707     |
| Invasive mechanical ventilation<br>( $n=4357$ )                                                                                     | 314 (7.2)   | 291 (7.4)  | 23 (5.5)  | 0.168     |
| <b>Intensive care unit (ICU)</b>                                                                                                    |             |            |           |           |
| Admission to ICU ( $n=4385$ )                                                                                                       | 415 (9.5)   | 371 (9.4)  | 44 (10.5) | 0.435     |
| Days in the ICU                                                                                                                     | 11 (10)     | 11 (11)    | 8.5 (10)  | 0.099     |
| <b>Death and readmission</b>                                                                                                        |             |            |           |           |
| Hospital length-of-stay, days<br>( $n=4392$ )                                                                                       | 8 (7)       | 8 (8)      | 7 (7)     | 0.067     |
| In-hospital death ( $n=4393$ )                                                                                                      | 194 (4.4)   | 191 (4.8)  | 3 (0.7)   | $< 0.001$ |
| Readmission ( $n=4194$ )                                                                                                            | 121 (2.9)   | 112 (2.9)  | 9 (2.3)   | 0.449     |
| ARDS: acute respiratory distress syndrome; ICU: intensive care unit<br>Data are expressed as n (%) and median [interquartile range] |             |            |           |           |

279

280

Figure 2. 30-days Kaplan-Meier survival curves.

281

282 The factors associated with in-hospital mortality are shown in **Table 3**. In  
 283 the first multivariate analysis model, age, male sex and Charlson Comorbidity  
 284 index score were associated with higher in-hospital mortality and healthcare  
 285 working with lower mortality (OR 0.219, 95%CI 0.069-0.693,  $p = 0.01$ ). In the

286 second model, including comorbidities, healthcare working was also associated  
 287 with a lower in-hospital mortality (OR 0.285 95%CI 0.089-0.908; p=0.034).

288

289 **Table 3. Factors associated with mortality**

| Variable                                                                                                                                                                                                                                                                                                                                  | Univariate           |        | Multivariate         |        |
|-------------------------------------------------------------------------------------------------------------------------------------------------------------------------------------------------------------------------------------------------------------------------------------------------------------------------------------------|----------------------|--------|----------------------|--------|
|                                                                                                                                                                                                                                                                                                                                           | OR (95%CI)           | p      | OR (95%CI)           | p      |
| <b>Model 1</b>                                                                                                                                                                                                                                                                                                                            |                      |        |                      |        |
| Age                                                                                                                                                                                                                                                                                                                                       | 1.073 (1.053-1.095)  | <0.001 | 1.370 (1.287-1.458)  | <0.001 |
| Male sex                                                                                                                                                                                                                                                                                                                                  | 1.884 (1.366-2.599)  | <0.001 | 1.062 (1.040-1.084)  | <0.001 |
| BAME                                                                                                                                                                                                                                                                                                                                      | 0.743 (0.505-1.094)  | 0.132  |                      |        |
| HCW                                                                                                                                                                                                                                                                                                                                       | 0.143 (0.045-0.449)  | 0.001  | 0.219 (0.069-0.693)  | 0.01   |
| CCI                                                                                                                                                                                                                                                                                                                                       | 1.423 (1.340-1.512)  | <0.001 | 2.088 (1.474-2.957)  | <0.001 |
| <b>Model 2</b>                                                                                                                                                                                                                                                                                                                            |                      |        |                      |        |
| Age                                                                                                                                                                                                                                                                                                                                       | 1.073 (1.053-1.095)  | <0.001 | 1.055 (1.031-1.081)  | <0.001 |
| Male sex                                                                                                                                                                                                                                                                                                                                  | 1.884 (1.366-2.599)  | <0.001 | 1.712 (1.159-2.530)  | 0.007  |
| BAME                                                                                                                                                                                                                                                                                                                                      | 0.743 (0.505-1.094)  | 0.132  |                      |        |
| HCW                                                                                                                                                                                                                                                                                                                                       | 0.143 (0.045-0.449)  | 0.001  | 0.285 (0.089-0.908)  | 0.034  |
| Alcohol                                                                                                                                                                                                                                                                                                                                   | 2.642 (1.604-4.351)  | <0.001 | 1.266 (0.674-2.379)  | 0.463  |
| Smoking                                                                                                                                                                                                                                                                                                                                   | 2.491 (1.625-3.820)  | <0.001 | 2.436 (1.473-4.030)  | 0.001  |
| Hypertension                                                                                                                                                                                                                                                                                                                              | 2.362 (1.762-3.166)  | <0.001 | 1.360 (0.923-2.004)  | 0.120  |
| Dyslipidemia                                                                                                                                                                                                                                                                                                                              | 1.886 (1.393-2.552)  | <0.001 | 0.819 (0.543-1.236)  | 0.342  |
| Obesity                                                                                                                                                                                                                                                                                                                                   | 2.029 (1.471-2.798)  | <0.001 | 1.679 (1.136-2.481)  | 0.009  |
| Diabetes                                                                                                                                                                                                                                                                                                                                  | 2.870 (2.030-4.059)  | <0.001 | 1.464 (0.926-2.316)  | 0.103  |
| Acute myocardial infarction                                                                                                                                                                                                                                                                                                               | 2.609 (1.236-5.508)  | 0.012  | 1.278 (0.518-3.156)  | 0.595  |
| Heart failure                                                                                                                                                                                                                                                                                                                             | 3.660 (1.782-7.519)  | <0.001 | 1.158 (0.426-3.147)  | 0.773  |
| Atrial fibrillation                                                                                                                                                                                                                                                                                                                       | 2.279 (1.085-4.788)  | 0.03   | 0.939 (0.376-2.344)  | 0.893  |
| Stroke/TIA                                                                                                                                                                                                                                                                                                                                | 3.913 (2.178-7.033)  | <0.001 | 0.952 (0.417-2.171)  | 0.907  |
| Dementia                                                                                                                                                                                                                                                                                                                                  | 8.773 (4.551-16.910) | <0.001 | 8.884 (3.800-20.772) | <0.001 |
| COPD                                                                                                                                                                                                                                                                                                                                      | 6.017 (3.600-10.057) | <0.001 | 2.330 (1.233-4.403)  | 0.009  |
| OSAHS                                                                                                                                                                                                                                                                                                                                     | 3.165 (2.058-4.867)  | <0.001 | 1.659 (0.955-2.884)  | 0.072  |
| Moderate-severe CKD                                                                                                                                                                                                                                                                                                                       | 5.351 (3.138-9.126)  | <0.001 | 3.649 (1.889-7.051)  | <0.001 |
| Moderate-severe CLD                                                                                                                                                                                                                                                                                                                       | 5.375 (2.324-12.429) | <0.001 | 1.845 (0.657-5.180)  | 0.245  |
| Malignancy                                                                                                                                                                                                                                                                                                                                | 3.710 (2.490-5.527)  | <0.001 | 3.058 (1.891-4.943)  | <0.001 |
| BAME: black, Asian and minority ethnic; CCI: Charlson Comorbidity Index score; CI: confidence interval; CKD: chronic kidney disease; CLD; chronic liver disease; COPD: chronic obstructive pulmonary disease; HCW: healthcare workers; OR: odds ratio; OSAHS: obstructive sleep apnoea/hypopnoea syndrome; TIA: transient ischemic attack |                      |        |                      |        |

290

291 **DISCUSSION**

292 The main findings of our study were that hospitalised HCW had less  
 293 severe COVID-19 and lower mortality.

294

295           The demographic characteristics of our patients were consistent with  
296 other reports (14,18,19). Worldwide, men were more likely to be infected by  
297 SARS-CoV-2 than women. However, among HCW, women were the most  
298 affected (8,9,13,20). We think that this difference is due to the higher proportion  
299 of females in healthcare professions. When we compared our HCW cohort with  
300 those reported in other studies, our patients were more than ten years older (8-  
301 10,13,20,21). This could be due to the different inclusion criteria used in each  
302 study. In the USA, Hughes et al (8) reported on the characteristics of 100,570  
303 HCW with a median age of 41 years, of whom only 6832 were hospitalised.  
304 Wang et al included 80 HCW hospitalised in Wuhan, of whom 57 were  
305 confirmed cases and 23 were clinical diagnosis (11). In our cohort, only  
306 hospitalised patients between 20 and 65 years old with a confirmed diagnosis of  
307 COVID-19 were included, while the rest included all HCW with COVID-19.

308

309           An interesting finding in our study was that upon admission HCW  
310 presented milder symptoms, such as loss of smell or taste and arthralgia, less  
311 severe radiological findings and lower lactate dehydrogenase, C-reactive  
312 protein, serum ferritin and D-dimer levels. And all of it even though there was no  
313 difference between HCW and NHCW in time from onset of symptoms and  
314 admission. There was not an explanation for this, but we hypothesize that it  
315 could be due to HCW were hospitalised earlier and more easily than NHCW.

316

317           ARDS is overwhelmingly the main cause of death in hospitalised COVID-  
318 19 patients. In our study, sepsis was less frequent in HCW but there was no  
319 difference in ARDS, the rest of complications, the need of respiratory support



320 nor the ICU admission. In-hospital and 30-days mortality were lower in HCW. In  
321 a systematic review Similar results were reported in the systematic review by  
322 Sahu et al. (5). A healthy worker effect could explain these results. Severely ill  
323 and chronically disabled are ordinarily excluded from employment (22). The  
324 difference observed in prevalence of comorbidities between HCW and NHCW  
325 supports this explanation. The better clinical and analytical profile of the HCW at  
326 admission may be due to their knowledge of mild symptoms of COVID-19 and  
327 their ability to identify them in themselves. In this regard, increased education  
328 on the earliest and mildest symptoms of COVID-19 could help NHCW to  
329 recognize and to report them to a healthcare centre earlier in the course of their  
330 disease.

331

332 There are geographical differences in mortality observed in hospitalised  
333 COVID-19 HCW. In a teaching hospital in Belgium the mortality of HCW was  
334 0.5% (20). In a single-centre study in Wuhan, in-hospital death in HCW with  
335 confirmed SARS-CoV-2 infection was 1.7%, more than twice in our study (11).  
336 The mortality in a multicentre study in New York City was 21%, far higher than  
337 that we observed (19). Also, high mortality, 14.7%, was reported in Brazil (10).  
338 In Mexico, a mortality of 2% of HCW with COVID-19 was reported (21). Their  
339 mortality was higher than ours even though only 9% of them needed to be  
340 hospitalized. The authors explain their high mortality because of different  
341 reasons. On the one hand, in Mexico there is a high prevalence of comorbidities  
342 which are associated with severe COVID-19. On the other hand, due to  
343 structural inequalities, their healthcare system is highly heterogeneous and  
344 there is a remarkable amount of marginalized communities. Therefore, the



345 prevalence of comorbidities, the level of economic wealth, and the organization  
346 of healthcare in the different countries could explain these differences observed  
347 in the mortality.

348

349 Several studies have reported that age, male sex and comorbidity were  
350 associated with higher mortality in COVID-19 patients (23-26). However the  
351 research about healthcare working as risk factor of mortality is scarce. HCW  
352 worry and are afraid to be infected and die for COVID-19. Our results confirm  
353 that COVID-19 is less severe and leads to less mortality in HCW. This is one of  
354 the novel contributions of our study.

355

356 Among the strengths of our study are its multicentre design, the inclusion  
357 of patients from the entire country, and the large number of patients included,  
358 which provides an adequate statistical power to confirm hypotheses. However,  
359 our study also has limitations. Only hospitalised patients were included, so it is  
360 not possible to extrapolate our results to non-hospitalised patients. The large  
361 number of researchers involved and variability in the availability of data in each  
362 hospital could have led to information bias. Finally, the voluntary participation of  
363 each centre could have caused selection bias.

364

365 In conclusion, HCW had fewer comorbidities, milder symptoms, and a  
366 better prognosis than the NHCW. Our results suggest that professional  
367 exposure to COVID-19 in HCW does not lead to greater clinical severity nor  
368 mortality.

369

370 **Acknowledgments. List of the SEMI-COVID-19 Network members**

371

372 **Coordinator of the SEMI-COVID-19 Registry:** José Manuel Casas Rojo.

373

374 **SEMI-COVID-19 Scientific Committee Members:** José Manuel Casas Rojo,  
375 José Manuel Ramos Rincón, Carlos Lumbreras Bermejo, Jesús Millán Núñez-  
376 Cortés, Juan Miguel Antón Santos, Ricardo Gómez Huelgas.

377

378 **SEMI-COVID-19 Registry Coordinating Center:** S & H Medical Science  
379 Service.

380

381 **Members of the SEMI-COVID-19 Group**

382

383

384

385 H. U. 12 de Octubre. Madrid

386 Paloma Agudo de Blas, Coral Arévalo Cañas, Blanca Ayuso, José Bascuñana  
387 Morejón, Samara Campos Escudero, María Carnevali Frías, Santiago Cossio  
388 Tejido, Borja de Miguel Campo, Carmen Díaz Pedroche, Raquel Diaz Simon,  
389 Ana García Reyne, Lucia Jorge Huerta, Antonio Lalueza Blanco, Jaime  
390 Laureiro Gonzalo, Carlos Lumbreras Bermejo, Guillermo Maestro de la Calle,  
391 Barbara Otero Perpiña, Diana Paredes Ruiz, Marcos Sánchez Fernández,  
392 Javier Tejada Montes.

393

394 H. U. Gregorio Marañón. Madrid

395 Laura Abarca Casas, Álvaro Alejandro de Oña, Rubén Alonso Beato, Leyre  
396 Alonso Gonzalo, Jaime Alonso Muñoz, Crhistian Mario Amodeo Oblitas,  
397 Cristina Ausín García, Marta Bacete Cebrián, Jesús Baltasar Corral, Maria  
398 Barrientos Guerrero, Alejandro Bendala Estrada, María Calderón Moreno,  
399 Paula Carrascosa Fernández, Raquel Carrillo, Sabela Castañeda Pérez, Eva  
400 Cervilla Muñoz, Agustín Diego Chacón Moreno, María Carmen Cuenca  
401 Carvajal, Sergio de Santos, Andrés Enríquez Gómez, Eduardo Fernández  
402 Carracedo, María Mercedes Ferreiro-Mazón Jenaro, Francisco Galeano Valle,  
403 Alejandra Garcia, Irene Garcia Fernandez-Bravo, María Eugenia García Leoni,  
404 Maria Gomez Antunez, Candela González San Narciso, Anthony Alexander  
405 Gurjian, Lorena Jiménez Ibáñez, Cristina Lavilla Olleros, Cristina Llamazares  
406 Mendo, Sara Luis García, Víctor Mato Jimeno, Clara Millán Nohales, Jesús  
407 Millán Núñez-Cortés, Sergio Moragón Ledesma, Antonio Muiño Miguez, Cecilia  
408 Muñoz Delgado, Lucía Ordieres Ortega, Susana Pardo Sánchez, Alejandro  
409 Parra Virto, María Teresa Pérez Sanz, Blanca Pinilla Llorente, Sandra Piqueras  
410 Ruiz, Guillermo Soria Fernández-Llamazares, María Toledano Macías, Neera  
411 Toledo Samaniego, Ana Torres do Rego, Maria Victoria Villalba Garcia, Gracia  
412 Villarreal, María Zurita Etayo.

413

414 Hospital Universitari de Bellvitge. L'Hospitalet de Llobregat

415 Xavier Corbella, Abelardo Montero, Jose María Mora-Luján.

416

417 C. H. U. de Albacete. Albacete

418 Jose Luis Beato Pérez, María Lourdes Sáez Méndez.

419

420 H. U. La Paz-Cantoblanco-Carlos III. Madrid

421 Jorge Álvarez Troncoso, Francisco Arnalich Fernández, Francisco Blanco  
422 Quintana, Carmen Busca Arenzana, Sergio Carrasco Molina, Aranzazu  
423 Castellano Candalija, Germán Daroca Bengoa, Alejandro de Gea Grela, Alicia  
424 de Lorenzo Hernández, Alejandro Díez Vidal, Carmen Fernández Capitán,  
425 María Francisca García Iglesias, Borja González Muñoz, Carmen Rosario  
426 Herrero Gil, Juan María Herrero Martínez, Víctor Hontañón, María Jesús Jaras  
427 Hernández, Carlos Lahoz, Cristina Marcelo Calvo, Juan Carlos Martín  
428 Gutiérrez, Monica Martínez Prieto, Elena Martínez Robles, Araceli Menéndez  
429 Saldaña, Alberto Moreno Fernández, Jose Maria Mostaza Prieto, Ana Noblejas  
430 Mozo, Carlos Manuel Oñoro López, Esmeralda Palmier Peláez, Marina  
431 Palomar Pampyn, María Angustias Quesada Simón, Juan Carlos Ramos  
432 Ramos, Luis Ramos Ruperto, Aquilino Sánchez Purificación, Teresa Sancho  
433 Bueso, Raquel Sorriguieta Torre, Clara Itziar Soto Abanedes, Yeray Untoria  
434 Tabares, Marta Varas Mayoral, Julia Vásquez Manau.

435

436 Complejo Asistencial de Segovia. Segovia

437 Eva María Ferreira Pasos, Daniel Monge Monge, Alba Varela García.

438

439 H. U. Puerta de Hierro. Majadahonda

440 María Álvarez Bello, Ane Andrés Eisenhofer, Ana Arias Milla, Isolina Baños  
441 Pérez, Javier Bilbao Garay, Silvia Blanco Alonso, Jorge Calderón Parra,  
442 Alejandro Callejas Díaz, José María Camino Salvador, M<sup>a</sup> Cruz Carreño  
443 Hernández, Valentín Cuervas-Mons Martínez, Sara de la Fuente Moral, Miguel  
444 del Pino Jimenez, Alberto Díaz de Santiago, Itziar Diego Yagüe, Ignacio Donate  
445 Velasco, Ana María Duca, Pedro Durán del Campo, Gabriela Escudero López,  
446 Esther Expósito Palomo, Ana Fernández Cruz, Esther Fiz Benito, Andrea Fraile  
447 López, Amy Galán Gómez, Sonia García Prieto, Claudia García Rodríguez-  
448 Maimón, Miguel Ángel García Viejo, Javier Gómez Irusta, Edith Vanessa  
449 Gutiérrez Abreu, Isabel Gutiérrez Martín, Ángela Gutiérrez Rojas, Andrea  
450 Gutiérrez Villanueva, Jesús Herráiz Jiménez, Pedro Laguna del Estal, M<sup>a</sup>  
451 Carmen Máinez Sáiz, Cristina Martín Martín, María Martínez Urbistondo,  
452 Fernando Martínez Vera, Susana Mellor Pita, Patricia Mills Sánchez, Esther  
453 Montero Hernández, Alberto Mora Vargas, Cristina Moreno López, Alfonso  
454 Ángel-Moreno Maroto, Victor Moreno-Torres Concha, Ignacio Morrás De La  
455 Torre, Elena Muñoz Rubio, Ana Muñoz Gómez, Rosa Muñoz de Benito,  
456 Alejandro Muñoz Serrano, Jose María Palau Fayós, Ilduara Pintos Pascual,  
457 Antonio Ramos Martínez, Isabel Redondo Cánovas del Castillo, Alberto Roldán  
458 Montaud, Lucía Romero Imaz, Yolanda Romero Pizarro, Mónica Sánchez  
459 Santiuste, David Sánchez Órtiz, Enrique Sánchez Chica, Patricia Serrano de la  
460 Fuente, Pablo Tutor de Ureta, Ángela Valencia Alijo, Mercedes Valentín-  
461 Pastrana Aguilar, Juan Antonio Vargas Núñez, Jose Manuel Vázquez  
462 Comendador, Gema Vázquez Contreras, Carmen Vizoso Gálvez.

463

464 H. Miguel Servet. Zaragoza

465 Gonzalo Acebes Repiso, Uxua Asín Samper, María Aranzazu Caudevilla  
466 Martínez, José Miguel García Bruñén, Rosa García Fenoll, Jesús Javier  
467 González Igual, Laura Letona Giménez, Mónica Llorente Barrio, Luis Sáez  
468 Comet.

469

470 H. U. La Princesa. Madrid

471 María Aguilera García, Ester Alonso Monge, Jesús Álvarez Rodríguez, Claudia  
472 Alvarez Varela, Miquel Berniz Gòdia, Marta Briega Molina, Marta Bustamante  
473 Vega, Jose Curbelo, Alicia de las Heras Moreno, Ignacio Descalzo Godoy,  
474 Alexia Constanza Espiño Alvarez, Ignacio Fernández Martín-Caro, Alejandra  
475 Franquet López-Mosteiro, Gonzalo Galvez Marquez, María J. García Blanco,  
476 Yaiza García del Álamo Hernández, Clara García-Rayó Encina, Noemí Gilabert  
477 González, Carolina Guillermo Rodríguez, Nicolás Labrador San Martín, Manuel  
478 Molina Báez, Carmen Muñoz Delgado, Pedro Parra Caballero, Javier Pérez  
479 Serrano, Laura Rabes Rodríguez, Pablo Rodríguez Cortés, Carlos Rodriguez  
480 Franco, Emilia Roy-Vallejo, Monica Rueda Vega, Aresio Sancha Lloret, Beatriz  
481 Sánchez Moreno, Marta Sanz Alba, Jorge Serrano Ballester, Alba Somovilla,  
482 Carmen Suarez Fernández, Macarena Vargas Tirado, Almudena Villa Marti.

483

484

485 H. U. de A Coruña. A Coruña

486 Alicia Alonso Álvarez, Olaya Alonso Juarros, Ariadna Arévalo López, Carmen  
487 Casariego Castiñeira, Ana Cerezales Calviño, Marta Contreras Sánchez,  
488 Ramón Fernández Varela, Santiago J. Freire Castro, Ana Padín Trigo, Rafael  
489 Prieto Jarel, Fátima Raad Varea, Laura Ramos Alonso, Francisco Javier  
490 Sanmartín Pensado, David Vieito Porto.

491

492 H. Clinico San Carlos. Madrid

493 Inés Armenteros Yeguas, Javier Azaña Gómez, Julia Barrado Cuchillo, Irene  
494 Burruezo López, Noemí Cabello Clotet, Alberto E. Calvo Elías, Elpidio Calvo  
495 Manuel, Carmen María Cano de Luque, Cynthia Chocron Benbunan, Laura  
496 Dans Vilan, Ester Emilia Dubon Peralta, Vicente Estrada Pérez, Santiago  
497 Fernandez, Marcos Oliver Fragiél Saavedra, José Luis García Klepzig, Maria  
498 del Rosario Iguarán, Esther Jaén Ferrer, Rubén Ángel Martín Sánchez, Manuel  
499 Méndez Bailón, María José Nuñez Orantos, Carolina Olmos Mata, Eva Orviz  
500 García, David Oteo Mata, Cristina Outon González, Juncal Perez-  
501 Somarriba, Pablo Pérez Mateos, Maria Esther Ramos Muñoz, Xabier Rivas  
502 Regaira, Iñigo Sagastagoitia Fornie, Alejandro Salinas Botrán, Miguel Suárez  
503 Robles, Maddalena Elena Urbano, Miguel Villar Martínez.

504

505 H. Infanta Sofía. S. S. de los Reyes

506 Rafael del Castillo Cantero, Rebeca Fuerte Martínez, Arturo Muñoz Blanco,  
507 José Francisco Pascual Pareja, Isabel Perales Fraile, Isabel Rábago Lorite,  
508 Llanos Soler Rangel, Inés Suárez García, Jose Luis Valle López.

509

510 Hospital Universitario Dr. Peset. Valencia

511 Juan Alberto Aguilera Ayllón, Arturo Artero Mora, María del Mar Carmona  
512 Martín, María José Fabiá Valls, Maria de Mar Fernández Garcés, Ana Belén  
513 Gómez Belda, Ian López Cruz, Manuel Madrazo López, Elisabet Mateo  
514 Sanchis, Jaume Micó Gandia, Laura Piles Roger, Adela Maria Pina Belmonte,  
515 Alba Viana García.

516

517 Hospital Clínico de Santiago. Santiago de Compostela

518 Maria del Carmen Beceiro Abad, Maria Aurora Freire Romero, Sonia Molinos  
519 Castro, Emilio Manuel Paez Guillan, María Pazo Nuñez, Paula Maria Pesqueira  
520 Fontan.

- 521  
522 Hospital Royo Villanova. Zaragoza  
523 Nicolás Alcalá Rivera, Anxela Crestelo Vieitez, Esther del Corral, Jesús Díez  
524 Manglano, Isabel Fiteni Mera, Maria del Mar Garcia Andreu, Martin Gerico  
525 Aseguinolaza, Claudia Josa Laorden, Raul Martinez Murgui, Marta Teresa  
526 Matía Sanz.  
527  
528 H. U. Infanta Cristina. Parla  
529 Juan Miguel Antón Santos, Ana Belén Barbero Barrera, Coralía Bueno Muiño,  
530 Ruth Calderón Hernaiz, Irene Casado Lopez, José Manuel Casas Rojo, Andrés  
531 Cortés Troncoso, Mayte de Guzmán García-Monge, Francesco Deodati,  
532 Gonzalo García Casasola Sánchez, Elena Garcia Guijarro, Davide Luordo,  
533 María Mateos González, Jose A Melero Bermejo, Lorea Roteta García, Elena  
534 Sierra Gonzalo, Javier Villanueva Martínez.  
535  
536 H. de Cabueñes. Gijón  
537 Ana María Álvarez Suárez, Carlos Delgado Vergés, Rosa Fernandez-Madera  
538 Martínez, Eva Fonseca Aizpuru, Alejandro Gómez Carrasco, Cristina Helguera  
539 Amezua, Juan Francisco López Caleyá, María del Mar Martínez López, Aleida  
540 Martínez Zapico, Carmen Olabuenaga Iscar, María Luisa Taboada Martínez,  
541 Lara María Tamargo Chamorro.  
542  
543 H. Santa Marina. Bilbao  
544 María Areses Manrique, Ainara Coduras Erdozain, Ane Elbire Labirua-Iturburu  
545 Ruiz.  
546  
547 Hospital de Urduliz Alfredo Espinosa. Urdúliz  
548 María Aparicio López, Asier Aranguren Arostegui, Paula Arriola Martínez,  
549 Gorka Arroita Gonzalez, M<sup>a</sup> Soledad Azcona Losada, Miriam García Gómez,  
550 Eduardo Garcia Lopez, Amalur Iza Jiménez, Alazne Lartategi Iraurgi, Esther  
551 Martinez Becerro, Itziar Oriñuela González, Isabel María Portales Fernández,  
552 Pablo Ramirez Sánchez, Beatriz Ruiz Estévez, Cristian Vidal Núñez.  
553  
554 Hospital HLA Moncloa. Madrid  
555 Guillermo Estrada, Teresa Garcia Delange, Isabel Jimenez Martinez, Carmen  
556 Martinez Cilleros, Nuria Parra Arribas.  
557  
558 H. del Henares. Coslada  
559 Jesús Ballano Rodríguez-Solís, Luis Cabeza Osorio, María del Pilar Fidalgo  
560 Montero, M<sup>a</sup> Isabel Fuentes Soriano, Erika Esperanza Lozano Rincon, Ana  
561 Martín Hermida, Jesus Martinez Carrilero, Jose Angel Pestaña Santiago,  
562 Manuel Sánchez Robledo, Patricia Sanz Rojas, Nahum Jacobo Torres Yebes,  
563 Vanessa Vento.  
564  
565 H. Nuestra Señora del Prado. Talavera de la Reina  
566 Sonia Casallo Blanco, Jeffrey Oskar Magallanes Gamboa.  
567  
568 H. U. Torre vieja. Torre vieja  
569 Julio César Blázquez Encinar.  
570



571 H. U. La Fe. Valencia

572 Dafne Cabañero, María Calabuig Ballester, Pascual Císcar Fernández, Ricardo  
573 Gil Sánchez, Marta Jiménez Escrig, Cristina Marín Amela, Laura Parra Gómez,  
574 Carlos Puig Navarro, José Antonio Todolí Parra.

575

576 H. San Pedro. Logroño

577 Diana Alegre González, Irene Ariño Pérez de Zabalza, Sergio Arnedo  
578 Hernández, Jorge Collado Sáenz, Beatriz Dendariena, Marta Gómez del Mazo,  
579 Iratxe Martínez de Narvajás Urra, Sara Martínez Hernández, Estela Menendez  
580 Fernández, Jose Luís Peña Somovilla, Elisa Rabadán Pejenaute.

581

582 Hospital Universitario Ntra Sra Candelaria. Santa Cruz de Tenerife

583 Lucy Abella, Andrea Afonso Díaz, Selena Gala Aguilera Garcia, Marta  
584 Bethencourt Feria, Eduardo Mauricio Calderón Ledezma, Sara Castaño Perez,  
585 Guillermo Castro Gainett, José Manuel del Arco Delgado, Joaquín Delgado  
586 Casamayor, Diego Garcia Silvera, Alba Gómez Hidalgo, Marcelino Hayek  
587 Peraza, Carolina Hernández Carballo, Rubén Hernández Luis, Francisco Javier  
588 Herrera Herrera, Maria del Mar Lopez Gamez, Julia Marfil Daza, María José  
589 Monedero Prieto, María Blanca Monereo Muñoz, María de la Luz Padilla  
590 Salazar, Daniel Rodríguez Díaz, Alicia Tejera, Laura Torres Hernández.

591

592 H. U. San Juan de Alicante. San Juan de Alicante

593 David Balaz, David Bonet Tur, Carles García Cervera, David Francisco García  
594 Núñez, Vicente Giner Galvañ, Angie Gómez Uranga, Javier Guzmán Martínez,  
595 Isidro Hernández Isasi, Lourdes Lajara Villar, Juan Manuel Núñez Cruz, Sergio  
596 Palacios Fernández, Juan Jirge Peris García, Andrea Riaño Pérez, José Miguel  
597 Seguí Ripoll, Philip Wikman-Jorgensen.

598

599 H. U. San Agustin. Avilés

600 Andrea Álvarez García, Víctor Arenas García, Alba Barragán Mateos, Demelsa  
601 Blanco Suárez, María Caño Rubia, Jaime Casal Álvarez, David Castrodá Copa,  
602 José Ferreiro Celeiro, Natalia García Arenas, Raquel García Noriega, Joaquin  
603 Llorente García, Irene Maderuelo Riesco, Paula Martínez Garcia, Maria Jose  
604 Menendez Calderon, Diego Eduardo Olivo Aguilar, Marta Nataya Solís  
605 Marquínez, Luis Trapiella Martínez, Andrés Astur Treceño García, Juan Valdés  
606 Bécares.

607

608 H. U. Son Llätzer. Palma de Mallorca

609 Andrés de la Peña Fernández, Almudena Hernández Milián.

610

611 H. de Mataró. Mataró

612 Raquel Aranega González, Ramon Boixeda, Carlos Lopera Mármol, Marta  
613 Parra Navarro, Ainhoa Rex Guzmán, Aleix Serrallonga Fustier.

614

615 H. Juan Ramón Jiménez. Huelva

616 Francisco Javier Bejarano Luque, Francisco Javier Carrasco-Sánchez,  
617 Mercedes de Sousa Baena, Jaime Díaz Leal, Aurora Espinar Rubio, Maria  
618 Franco Huertas, Juan Antonio García Bravo, Andrés Gonzalez Macías,  
619 Encarnación Gutiérrez Jiménez, Constantino Lozano Quintero, Carmen  
620 Mancilla Reguera, Francisco Javier Martínez Marcos, Francisco Muñoz

621 Beamud, Maria Perez Aguilera, Alícia Perez Jiménez, Virginia Rodríguez  
622 Castaño, Alvaro Sánchez de Alcazar del Río, Leire Toscano Ruiz.

623

624 H. U. Reina Sofía. Córdoba

625 Antonio Pablo Arenas de Larriva, Pilar Calero Espinal, Javier Delgado Lista,  
626 María Jesús Gómez Vázquez, Jose Jiménez Torres, Laura Martín Piedra,  
627 Javier Pascual Vinagre, María Elena Revelles Vílchez, Juan Luis Romero  
628 Cabrera, José David Torres Peña.

629

630 H. Moisès Broggi. Sant Joan Despí

631 Jose Loureiro Amigo, Melani Pestaña Fernández, Nicolas Rhyman, Nuria  
632 Vázquez Piqueras.

633

634

635

636 H. U. Virgen de las Nieves. Granada

637 Pablo Conde Baena, Joaquin Escobar Sevilla, Laura Gallo Padilla, Patricia  
638 Gómez Ronquillo, Pablo González Bustos, María Navío Botías, Jessica  
639 Ramírez Taboada, Mar Rivero Rodríguez.

640

641 H. San Juan de la Cruz. Úbeda

642 Marcos Guzmán García, Francisco Javier Vicente Hernández.

643

644 Hospital Costa del Sol. Marbella

645 Victoria Agustín Bandera, María Dolores Martín Escalante.

646

647 Complejo Asistencial Universitario de León. León

648 Rosario Maria García Die, Manuel Martin Regidor, Angel Luis Martínez  
649 Gonzalez, Alberto Muela Molinero, Raquel Rodríguez Díez, Beatriz Vicente  
650 Montes.

651

652 Hospital Clinic Barcelona. Barcelona

653 Júlia Calvo Jiménez, Aina Capdevila Reniu, Irene Carbonell De Boule,  
654 Emmanuel Coloma Bazán, Joaquim Fernández Solà, Cristina Gabara Xancó,  
655 Joan Ribot Grabalosa, Olga Rodríguez Núñez.

656

657 Hospital Marina Baixa. Villajoyosa

658 Javier Ena, Jose Enrique Gómez Segado.

659

660 C. H. U. de Ferrol. Ferrol

661 Hortensia Alvarez Diaz, Tamara Dalama Lopez, Estefania Martul Pego, Carmen  
662 Mella Pérez, Ana Pazos Ferro, Sabela Sánchez Trigo, Dolores Suarez  
663 Sambade, Maria Trigas Ferrin, Maria del Carmen Vázquez Friol, Laura Vilariño  
664 Maneiro.

665

666 Hospital del Tajo. Aranjuez

667 Ruth Gonzalez Ferrer, Raquel Monsalvo Arroyo.

668

669 H. U. Marqués de Valdecilla. Santander

- 670 Marta Fernández-Ayala Novo, José Javier Napal Lecumberri, Nuria Puente  
671 Ruiz, Jose Riancho, Isabel Sampedro Garcia.  
672  
673 Hospital Torrecárdenas. Almería  
674 Luis Felipe Díez García, Iris El Attar Acedo, Bárbara Hernandez Sierra, Carmen  
675 Mar Sánchez Cano.  
676  
677 Hospital Infanta Margarita. Cabra  
678 María Esther Guisado Espartero, Lorena Montero Rivas, Maria de la Sierra  
679 Navas Alcántara, Raimundo Tirado-Miranda.  
680  
681 H. U. Severo Ochoa. Leganés  
682 Yolanda Casillas Viera, Lucía Cayuela Rodríguez, Carmen de Juan Alvarez,  
683 Gema Flox Benitez, Laura García Escudero, Juan Martin Torres, Patricia  
684 Moreira Escriche, Susana Plaza Canteli, M Carmen Romero Pérez.  
685  
686 Hospital Insular de Gran Canaria. Las Palmas G. C.  
687 Carlos Jorge Ripper.  
688  
689 Hospital Valle del Nalón. Riaño (Langreo)  
690 Sara Fuente Cosío, César Manuel Gallo Álvaro, Julia Lobo García, Antía Pérez  
691 Piñeiro.  
692  
693 H. U. del Vinalopó. Elche  
694 Francisco Amorós Martínez, Erika Ascuña Vásquez, Jose Carlos Escribano  
695 Stablé, Adriana Hernández Belmonte, Ana Maestre Peiró, Raquel Martínez  
696 Goñi, M. Carmen Pacheco Castellanos, Bernardino Soldan Belda, David  
697 Vicente Navarro.  
698  
699 Hospital Alto Guadalquivir. Andújar  
700 Begoña Cortés Rodríguez.  
701  
702 H. Francesc de Borja. Gandia  
703 Alba Camarena Molina, Simona Cioaia, Anna Ferrer Santolalia, José María  
704 Frutos Pérez, Eva Gil Tomás, Leyre Jorquer Vidal, Marina Llopis Sanchis, Mari  
705 Ángeles Martínez Pascual, Alvaro Navarro Batet, Mari Amparo Perea Ribis,  
706 Ricardo Peris Sanchez, José Manuel Querol Ribelles, Silvia Rodriguez  
707 Mercadal, Ana Ventura Esteve.  
708  
709 H. G. U. de Castellón. Castellón de la Plana  
710 Jorge Andrés Soler, Marián Bennasar Remolar, Alejandro Cardenal Álvarez,  
711 Daniela Díaz Carlotti, María José Esteve Gimeno, Sergio Fabra Juana, Paula  
712 García López, María Teresa Guinot Soler, Daniela Palomo de la Sota, Guillem  
713 Pascual Castellanos, Ignacio Pérez Catalán, Celia Roig Martí, Paula Rubert  
714 Monzó, Javier Ruiz Padilla, Nuria Tornador Gaya, Jorge Usó Blasco.  
715  
716 H. Santa Bárbara. Soria  
717 Marta Leon Tellez.  
718  
719 C. A. U. de Salamanca. Salamanca



- 720 Gloria María Alonso Claudio, Víctor Barreales Rodríguez, Cristina Carbonell  
721 Muñoz, Adela Carpio Pérez, María Victoria Coral Orbes, Daniel Encinas  
722 Sánchez, Sandra Inés Revuelta, Miguel Marcos Martín, José Ignacio Martín  
723 González, José Ángel Martín Oterino, Leticia Moralejo Alonso, Sonia Peña  
724 Balbuena, María Luisa Pérez García, Ana Ramon Prados, Beatriz Rodríguez-  
725 Alonso, Ángela Romero Alegría, Maria Sanchez Ledesma, Rosa Juana Tejera  
726 Pérez.  
727  
728 H. U. de Canarias. Santa Cruz de Tenerife  
729 Julio Cesar Alvisa Negrin, José Fernando Armas González, Lourdes González  
730 Navarrete, Iballa Jiménez, María Candelaria Martín González, Miguel Nicolas  
731 Navarrete Lorite, Paula Ortega Toledo, Onán Pérez Hernández, Alina Pérez  
732 Ramírez.  
733  
734 H. de Poniente. Almería  
735 Juan Antonio Montes Romero, Encarna Sánchez Martín, Jose Luis Serrano  
736 Carrillo de Albornoz, Manuel Jesus Soriano Pérez.  
737  
738 H. U. Lucus Augusti. Lugo  
739 Raquel Gómez Méndez, Ana Rodríguez Álvarez.  
740  
741 H. San Pedro de Alcántara. Cáceres  
742 Angela Agea Garcia, Javier Galán González, Luis Gámez Salazar, Eva  
743 García Sardon, Antonio González Nieto, Itziar Montero Días, Selene Núñez  
744 Gaspar, Alvaro Santaella Gomez.  
745  
746 H. U. del Sureste. Arganda del Rey  
747 Jon Cabrejas Ugartondo, Ana Belén Mancebo Plaza, Arturo Noguero  
748 Asensio, Bethania Pérez Alves, Natalia Vicente López.  
749  
750 H. de Pozoblanco. Pozoblanco  
751 José Nicolás Alcalá Pedrajas, Antonia Márquez García, Inés Vargas.  
752  
753 Hospital Doctor José Molina Orosa. Arrecife (Lanzarote)  
754 Virginia Herrero García, Berta Román Bernal.  
755  
756 H. Nuestra Señora de Sonsoles. Ávila  
757 Alaaeldeen Abdelhady Kishta.  
758  
759 C. H. U. de Badajoz. Badajoz  
760 Rafael Aragon Lara, Inmaculada Cimadevilla Fernandez, Juan Carlos Cira  
761 García, Gema Maria García García, Julia Gonzalez Granados, Beatriz Guerrero  
762 Sánchez, Francisco Javier Monreal Periañez, Maria Josefa Pascual Perez.  
763  
764 H. G. U. de Elda. Elda  
765 Carmen Cortés Saavedra, Jennifer Fernández Gómez, Borja González López,  
766 María Soledad Hernández Garrido, Ana Isabel López Amorós, Maria de los  
767 Reyes Pascual Pérez, Andrea Torregrosa García.  
768  
769 H. U. Puerta del Mar. Cádiz

- 770 José Antonio Girón González, Susana Fabiola Pascual Perez, Cristina  
771 Rodríguez Fernández-Viagas, Maria José Soto Cardenas.  
772  
773 Hospital de Montilla. Montilla  
774 Ana Cristina Delgado Zamorano, Beatriz Gómez Marín, Adrián Montaña  
775 Martínez, Jose Luis Zambrana García.  
776  
777 H. Virgen de los Lirios. Alcoy (Alicante)  
778 M<sup>a</sup> José Esteban Giner.  
779  
780 H. Infanta Elena. Huelva  
781 María Gloria Rojano Rivero.  
782  
783 H. de la Axarquía. Vélez- Málaga  
784 Antonio Lopez Ruiz.  
785  
786 H. Virgen del Mar. Madrid  
787 Maria Jesus Gonzalez Juarez.  
788  
789 Hospital do Salnes. Vilagarcía de Arousa  
790 Vanesa Alende Castro, Ana María Baz Lomba, Ruth Brea Aparicio, Marta  
791 Fernandez Morales, Jesus Manuel Fernandez Villar, Maria Teresa Lopez  
792 Monteagudo, Cristina Pérez García, Lorena María Rodríguez Ferreira, Maria  
793 Begoña Valle Feijoo.

794 **REFERENCES**

- 795 1. World Health Organization. WHO coronavirus disease (COVID-19)  
796 dashboard. Available from:  
797 [https://covid19.who.int/?gclid=EAlalQobChMljcGK1NDe6QIVWojVCh0vh](https://covid19.who.int/?gclid=EAlalQobChMljcGK1NDe6QIVWojVCh0vhQLLEAAYASABEgKs2fD_BwE)  
798 [QLLEAAYASABEgKs2fD\\_BwE](https://covid19.who.int/?gclid=EAlalQobChMljcGK1NDe6QIVWojVCh0vhQLLEAAYASABEgKs2fD_BwE). Last accessed: October, 30, 2020.
- 799 2. Venogupal U, Jilani N, Rabah S, Shariff MA, Jawed M, Medez Batres A,  
800 et al. SARS-CoV-2 seroprevalence among health care workers in a New  
801 York city hospital: a cross-sectional analysis during the COVID-19  
802 pandemic. *Int J Infect Dis* 2020;  
803 <http://doi.org/10.1016/j.ijid.2020.10.036>.
- 804 3. Rudberg AS, Havervall S, Manberg A, Falk AJ, Aguilera K, Ng, H, et al.  
805 SARS-CoV-2 exposure, symptoms and seroprevalence in healthcare  
806 workers in Sweden. *Nat Commun* 2020; 11: 5064.
- 807 4. Herzberg J, Vollmer T, Fischer B, Becher H, Becker AK, Sahly A, et al. A  
808 prospective sero-epidemiological evaluation of SARS-CoV-2 among  
809 health care workers in a German secondary care hospital. *Int J Infect Dis*  
810 2020; <http://doi.org/10.1016/j.ijid.2020.10.026>
- 811 5. Sahu AK, Amrithanand VT, Mathew R, Aggarwal P, Nayer J, Bhoi S.  
812 COVID-19 in health care workers – A systematic review and meta-  
813 analysis. *Am J Emerg Med* 2020; 38: 1727-31.
- 814 6. España: Ministerio de Sanidad. Situación de COVID-19 en España.  
815 [Internet]. Centro de Coordinación de Alertas y Emergencias Sanitarias.  
816 Enfermedad por el coronavirus (COVID-19). Available from:  
817 <https://covid19.isciii.es/>. Last accessed: May 24, 2020.
- 818 7. Shah ASV, Wood R, Gribben C, Caldwell C, Bishop J, Wier M, et al. Risk  
819 of hospital admission with coronavirus disease 2019 in healthcare  
820 workers and theirs households: nationwide linkage cohort study. *BMJ*  
821 2020; 371: m3582.
- 822 8. Hughes MM, Groenewold MR, Lessem SE, Xu K, Usseru EN, Wiegand  
823 RE, et al. Update: Characteristics of health care personnel with COVID-  
824 19 — United States, February 12–July 16, 2020. *MMWR* 2020; 69: 1364-  
825 8.
- 826 9. Lai X, Wang M, Qin C, Tan L, Ran L, Chen D, et al. Coronavirus disease  
827 2019 (COVID-19) infection among health care workers and implications  
828 for prevention measures in a tertiary hospital in Wuhan, China. *JAMA*  
829 *Network Open* 2020; 3: e209666.
- 830 10. Saraiva Duarte MM, Claudino Haslett MI, Alves de Freitas LJ, Nulle  
831 Gomes MT, Castanha da Silva DC, Percio J, et al. Description of COVID-  
832 19 hospitalized health care worker cases in the first nine weeks of the  
833 pandemic, Brazil, 2020. *Epidemiol Serv Saude* 2020; 29: e20200277.
- 834 11. Wang X, et al. Clinical characteristics of 80 hospitalized frontline medical  
835 workers infected with COVID-19 in Wuhan, China. *J Hosp Inf* 2020; 105:  
836 399-403.
- 837 12. Dominguez-Varela IA. High mortality among health personnel with  
838 COVID-19 in Mexico. *Disaster Med Public Health Prep* 2020; Oct 13: 1-4.
- 839 13. Nienhaus A, Hod R. COVID-19 among health workers in Germany and  
840 Malaysia. *Int J Environ Res Public Health* 2020; 17: 4881.
- 841 14. Casas Rojo JM, Antón Santos JM, Nuñez-Cortés JM, Lumbreras C,  
842 Ramos Rincón JM, Roy-Vallejo E, et al; for the SEMI-COVID-19  
843 Network. Clinical characteristics of patients hospitalized with COVID-19

- 844 in Spain: results from the SEMI-COVID-19 Network. *Rev Clin Esp* 2020;  
845 220: 480-94.
- 846 15. Rodilla E, Saura A, Jiménez I, Mendizábal A, Pineda-Cantero A,  
847 Lorenzo-Hernández, et al. Association of hypertension with all-cause  
848 mortality among hospitalized patients with COVID-19. *J Clin Med* 2020;  
849 9: E3136.
- 850 16. Ramos Rincón JM, Buonaiuto V, Ricci M, Martín-Carmona J, Paredes-  
851 Ruiz D, Calderón-Moreno M, et al; for the SEMI-COVID-19 Network.  
852 Clinical characteristics and risk factors for mortality in very old patients  
853 hospitalized with COVID-19 in Spain. *J Gerontol A Biol Sci Med Sci*  
854 2020; Oct 26: glaa243.
- 855 17. Charlson ME, Pompei P, Ales KL, MacKenzie CR. A new method of  
856 classifying prognostic comorbidity in longitudinal studies: development  
857 and validation. *J Chron Dis* 1987; 40: 373-83.
- 858 18. Guan W, Ni Z, Hu Y, Liang W, Ou C, He J, et al. Clinical Characteristics  
859 of Coronavirus Disease 2019 in China. *N Engl J Med* 2020; 382:  
860 1708-20.
- 861 19. Richardson S, Hirsch JS, Narasimhan M, Crawford JM, McGinn T,  
862 Davidson KW, et al. Presenting Characteristics, Comorbidities, and  
863 Outcomes Among 5700 Patients Hospitalized With COVID-19 in the New  
864 York City Area. *JAMA* 2020; e206775.
- 865 20. Vandercam G, Simon A, Scohy A, Belkhir L, Kabamba B, Rodriguez  
866 Villalobos H, et al. Clinical characteristics and humoral immune response  
867 in healthcare workers with COVID-19 in a teaching hospital in Belgium. *J  
868 Hosp Infection* 2020; 106: 713-20.
- 869 21. Antonio-Villa NE, Bello-Chavolla OY, Vargas-Vázquez A, Fermín-  
870 Martínez CA, Márquez-Salinas A, Bahena-López JP. Health-care  
871 workers with COVID-19 living in Mexico City: clinical characterization and  
872 related outcomes. *Clin Infect Dis* 2020; Sep 28, ciaa1487. doi:  
873 10.1093/cid/ciaa1487.
- 874 22. Last J. A dictionary of epidemiology. 3<sup>rd</sup> ed. Oxford, UK: Oxford  
875 University Press; 1995.
- 876 23. Ho FK, Petermann-Rocha F, Gray SR, Jani BD, Katikireddi SV,  
877 Niedzwiedz CL, et al. Is older age associated with COVID-19 mortality in  
878 the absence of other risk factors? General population cohort study of  
879 470,034 participants. *PLoS ONE* 2020; 15: e0241824.
- 880 24. Zheng Z, Peng F, Hu B, Zhao J, Liu H, Peng J, et al. . Risk factors of  
881 critical & mortal COVID-19 cases: A systematic literature review and  
882 meta-analysis. *J Infect* 2020; 81: e16-25.
- 883 25. Yang J, Zheng Y, Gou X, Pu K, Chen Z, Guo Q, et al. Prevalence of  
884 comorbidities and its effects in coronavirus disease 2019 patients: A  
885 systematic review and meta-analysis. *Int J Infect Dis* 2020; 94 :91–5.
- 886 26. Zhou Y, Yang Q, Chi J, Dong B, Lv W, Shen L, et al. Comorbidities and  
887 the risk of severe or fatal outcomes associated with coronavirus disease  
888 2019: A systematic review and meta-analysis. *Int J Infect Dis* 2020; 99:  
889 47-56.

11,682 patients in the SEMI-COVID-19 Registry

298 patients did not specify if they were healthcare workers

10,608 patients

6,163 patients over 65 years old

13 patients under 20 years old

39 patients without data on age

4,393 patients included in the study

419 healthcare workers

3,974 non healthcare workers

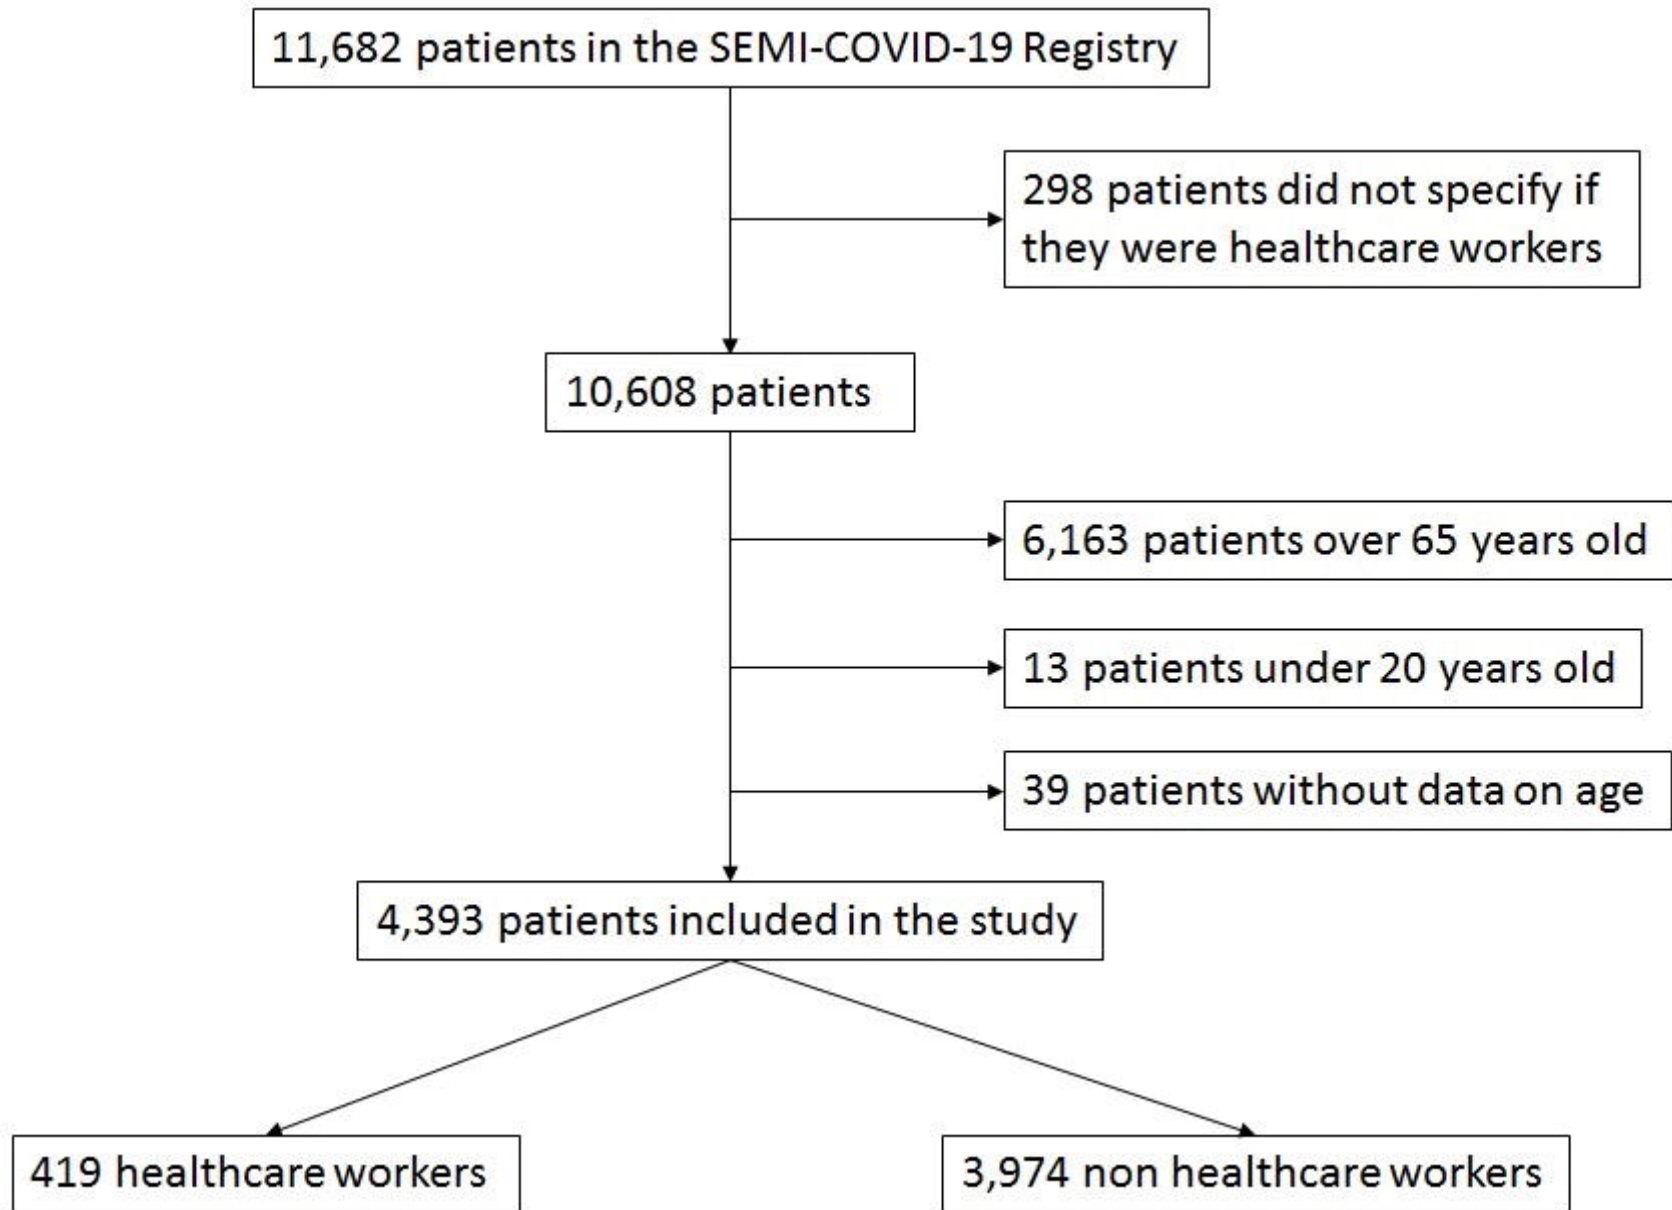

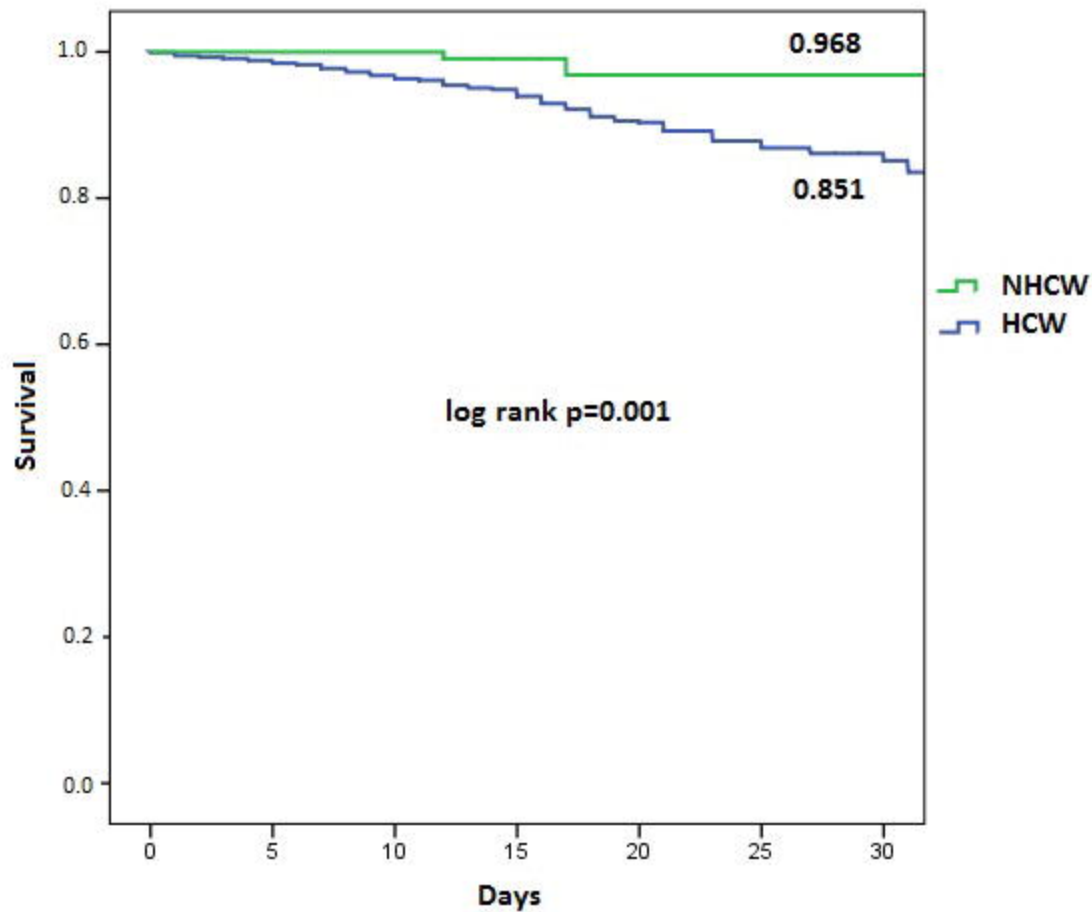

Source: https://medrxiv.org/content/medrxiv/early/2020/11/24/2020.11.23.20236810.full.pdf
